# Supplementary material for: An anatomical and physiological basis for flexible coincidence detection in the auditory system
Source: eLife. 2025 Apr 15;13:RP100492. doi: 10.7554/eLife.100492 (PMC11999698; doi:10.7554/eLife.100492)
Supplement: Figure 1—source data 1. [file elife-100492-fig1-data1.xlsx]

## Sheet: Figure 1F
Figure 1F
Experiment ID	Group	Puncta	Surface Area (um2)	Puncta/100um2
LK1093L_Cell01	SGN	847	5653.49	14.9819
LK1202L_Cell01	SGN	716	7867.98	9.10018
LK1203R_Cell01	SGN	284	3484.24	8.15099
LK1203R_Cell03	SGN	397	3227.15	12.3019
LK1203R_Cell04	SGN	485	3902.41	12.4282
LK1203L_Cell01	SGN	356	5004.5	7.1136
LK1203L_Cell02	SGN	459	5966.08	7.6935
LK1208L_Cell01	SGN	769	5736.65	13.405
LK1634R_Cell01	Gly.	473	11295	4.18768
LK1634R_Cell02	Gly.	354	8570.09	4.13065
LK1634R_Cell03	Gly.	109	2873.06	3.79386
LK2408L_Cell01	Gly.	280	7617.97	3.67552
LK2408R_Cell01	Gly.	413	13746	3.0045
LK2408R_Cell02	Gly.	522	13128.7	3.97602
LK2411R_Cell01	Gly.	545	10727.3	5.08048
LK2411R_Cell02	Gly.	730	13307.3	5.48573
		mean	SGN	10.6469
		mean	Gly.	4.1668
		SD	SGN	2.97946
		SD	Gly.	0.787756
