# Supplementary material for: An anatomical and physiological basis for flexible coincidence detection in the auditory system
Source: eLife. 2025 Apr 15;13:RP100492. doi: 10.7554/eLife.100492 (PMC11999698; doi:10.7554/eLife.100492)
Supplement: Figure 2—source data 1. [file elife-100492-fig2-data1.xlsx]

## Sheet: Figure 2C
Figure 2C
Experiment ID	Total Count	Ntng1-tdT Count	tdT+,CR+ Count	Perct Ia	Perct Ib/c	Perct Ib
LK1678_cochlea	446	269	113	39.6861	60.3139	25.3363
LK1719_cochlea	199	121	44	39.196	60.804	22.1106
LK0397_cochlea	346	217	161	37.2832	62.7168	46.5318
LK0623_cochlea	608	344	122	43.4211	56.5789	20.0658
			mean	39.8966	60.1034	28.5111
			SD	2.56821	2.56818	10.5725
