# Supplementary material for: An anatomical and physiological basis for flexible coincidence detection in the auditory system
Source: eLife. 2025 Apr 15;13:RP100492. doi: 10.7554/eLife.100492 (PMC11999698; doi:10.7554/eLife.100492)
Supplement: Figure 2—source data 2. [file elife-100492-fig2-data2.xlsx]

## Sheet: Figure 2E
Figure 2E
Experiment ID	Group	Puncta	Surface Area (um2)	Puncta/100um2
LK1093L_Cell01	SGN	847	5653.49	14.9819
LK1202L_Cell01	SGN	716	7867.98	9.10018
LK1203R_Cell01	SGN	284	3484.24	8.15099
LK1203R_Cell03	SGN	397	3227.15	12.3019
LK1203R_Cell04	SGN	485	3902.41	12.4282
LK1203L_Cell01	SGN	356	5004.5	7.1136
LK1203L_Cell02	SGN	459	5966.08	7.6935
LK1208L_Cell01	SGN	769	5736.65	13.405
LK1038_Cell01	Ib/c	207	5857.47	3.53395
LK1138L_Cell01	Ib/c	291	5011.8	5.80629
LK1138R_Cell01	Ib/c	493	12067.4	4.08538
LK1143L_Cell01	Ib/c	101	4436.32	2.27666
LK1143L_Cell02	Ib/c	345	7539.87	4.57568
LK1143R_Cell01	Ib/c	471	11374.8	4.14075
LK1016R_Cell01	Ib/c	624	12107.3	5.15393
LK1016R_Cell05	Ib/c	257	7744.35	3.31855
LK1490R_Cell02	Ib/c	109	2873.06	3.79386
		mean	SGN	10.6469
		mean	Ib/c	4.07612
		calc mean	Ia	6.5708
		SD	SGN	2.97946
		SD	Ib/c	1.0365
		SD	Ia	1.0365
