# Supplementary material for: An anatomical and physiological basis for flexible coincidence detection in the auditory system
Source: eLife. 2025 Apr 15;13:RP100492. doi: 10.7554/eLife.100492 (PMC11999698; doi:10.7554/eLife.100492)
Supplement: Figure 2—source data 3. [file elife-100492-fig2-data3.xlsx]

## Sheet: Figure 2F
Figure 2F
		--------------------------------------------------------------------------------------------------------- Puncta/100um2 (Binned Distance from Soma) ---------------------------------------------------------------------------------------------------------
Experiment ID	Group	soma	0.05	0.1	0.15	0.2	0.25	0.3	0.35	0.4	0.45	0.5	0.55	0.6	0.65	0.7	0.75	0.8	0.85	0.9	0.95	1
LK1093L_Cell01	SGN	incomplt	45.5653	21.2463	19.3924	17.2239	13.06	13.8161	11.2759	14.2968	15.8373	11.9896	12.4005	10.5044	8.80029	11.0596	11.184	11.2787	12.7841	9.90869	10.4845	7.53943
LK1202L_Cell01	SGN	12.7174	22.9933	12.5977	12.7623	11.7303	7.71109	8.88581	9.94204	9.8604	9.9306	7.77556	7.98686	8.77923	7.81992	7.01862	6.86647	5.9212	5.93421	7.2617	5.46767	4.24838
LK1203R_Cell01	SGN	incomplt	15.7152	13.2781	10.3099	7.34162	5.92777	8.72111	10.5032	8.37814	8.58107	8.78399	7.55173	4.2983	8.2634	6.94121	7.43412	0	6.47844	8.67638	6.42719	1.70005
LK1203R_Cell03	SGN	19.7098	19.039	11.1983	15.607	14.5248	15.8996	15.2264	10.3546	13.2114	11.6277	10.2688	9.08994	11.8437	9.63643	15.1056	11.8886	9.10271	8.7744	8.85634	9.41114	0
LK1203R_Cell04	SGN	18.4448	17.3941	18.2666	11.0793	11.2674	14.2086	13.3991	11.7737	10.2137	13.053	16.828	11.9576	11.2748	7.84429	10.4855	14.549	10.1411	9.52815	8.91518	12.6895	8.10212
LK1203L_Cell01	SGN	5.54273	12.9634	7.8529	9.29241	6.2645	6.34443	0	7.7154	7.7124	8.17291	8.53245	7.36589	7.07388	5.60416	7.58678	4.51682	5.79012	4.89043	5.97026	5.38073	2.88694
LK1203L_Cell02	SGN	8.81057	12.1286	6.31142	5.98835	9.87817	7.24807	7.68495	6.90501	9.8267	6.51764	7.07173	9.07248	6.36788	4.65647	5.36783	6.1433	10.4303	8.55587	8.27682	4.82475	0
LK1208L_Cell01	SGN	14.7059	22.5591	16.8299	11.8983	16.3	15.3989	12.6962	11.914	10.468	12.1808	10.512	7.76409	9.86359	1.6832	4.7667	3.3941	4.41236	5.43061	4.97794	5.23194	10.1853
LK1038_Cell01	Ib/c	5.40773	13.5991	7.68703	7.44926	8.01712	5.4355	6.22353	3.61657	4.99387	4.08741	4.85813	4.83592	7.22132	3.29363	6.20747	2.89505	1.03781	1.8211	3.16273	4.50435	4.12903
LK1138L_Cell01	Ib/c	8.15725	5.59376	5.5	3.54144	2.65898	0.864163	1.70693	0.436344	3.09331	5.20858	2.80388	2.68272	2.44816	1.55583	0.919323	1.12014	1.32572	1.81365	0.594877	0.297438	0
LK1138R_Cell01	Ib/c	4.57516	7.47838	12.0643	6.54076	7.01094	6.25653	1.44679	4.50738	4.93527	3.73651	4.87028	2.50863	6.02429	3.54492	2.53409	2.66621	4.16042	4.42523	4.24378	2.95057	0
LK1143L_Cell01	Ib/c	4.38159	9.19598	7.47785	6.6538	4.47416	5.03386	4.79316	3.95542	4.98472	3.91872	3.72251	3.14986	3.12883	2.76196	3.83883	2.42388	1.33286	1.47957	2.70252	0	0
LK1143L_Cell02	Ib/c	5.58539	8.51196	6.72901	4.42301	5.74662	5.84726	4.1479	4.09655	2.54444	2.64034	2.05974	2.80519	1.41591	0.841957	0	0	0	0	1.53636	0	0
LK1143R_Cell01	Ib/c	incomplt	8.88989	7.26359	5.68968	7.51892	5.83324	3.87185	4.54312	4.07496	3.83852	3.10129	2.00073	1.84486	2.07126	3.13977	4.11374	3.57837	3.67133	0	1.95827	6.35305
LK1016R_Cell01	Ib/c	3.60111	7.20452	5.08363	5.65731	5.04849	4.46794	6.08481	5.96641	5.57324	5.94242	5.66709	4.51757	4.56135	4.01879	4.79266	4.71953	3.92221	4.55931	4.49218	2.53312	2.33498
LK1016R_Cell05	Ib/c	incomplt	7.84085	4.53682	3.85543	3.71493	4.7415	4.09328	3.49644	2.62529	2.77647	3.22787	4.56129	2.30404	1.93793	1.81718	1.90167	1.2076	1.89288	0.797269	1.12775	2.84276
mean	SGN	13.3219	21.0448	13.4476	12.0412	11.8163	10.7248	10.0537	10.048	10.4959	10.7376	10.2203	9.14863	8.75072	6.78852	8.54147	8.24705	7.13456	7.79702	7.85541	7.48968	4.33277
mean	Ib/c	4.91086	8.53931	7.04278	5.47633	5.52377	4.81	4.04603	3.82728	4.10314	4.01862	3.78885	3.38274	3.61859	2.50328	2.90617	2.48003	2.07063	2.45788	2.19121	1.67144	1.95748
calc mean	Ia	8.3634	12.5055	6.40487	6.5649	6.29256	5.91481	6.00768	6.22071	6.3928	6.71901	6.43142	5.7659	5.13212	4.28524	5.63531	5.76702	5.06394	5.33914	5.6642	5.81824	2.37529
SEM	SGN	2.23755	3.7747	1.81028	1.43559	1.41163	1.52119	1.73676	0.649174	0.790405	1.06847	1.09937	0.70037	0.93126	0.930861	1.21977	1.37619	1.35318	0.932121	0.588257	1.0485	1.37137
SEM	Ib/c	1.20843	0.826218	0.828784	0.499478	0.671688	0.602792	0.622878	0.555686	0.423808	0.393844	0.434916	0.385922	0.743923	0.383528	0.720857	0.53833	0.555285	0.565322	0.635014	0.579145	0.848211
SD	Ia	2.33329	3.86406	1.99098	1.52	1.56329	1.63627	1.84508	0.854525	0.896857	1.13874	1.18227	0.799659	1.19192	1.00678	1.41686	1.47774	1.46268	1.09015	0.843176	1.19389	1.61249
