# Supplementary material for: An anatomical and physiological basis for flexible coincidence detection in the auditory system
Source: eLife. 2025 Apr 15;13:RP100492. doi: 10.7554/eLife.100492 (PMC11999698; doi:10.7554/eLife.100492)
Supplement: Figure 3—source data 1. [file elife-100492-fig3-data1.xlsx]

## Sheet: Figure 3B
Figure 3B
		--- Interstimulus Interval ---
Experiment ID	Group	20ms	100ms	200ms
20220809_02	SGN-Elect.	1.00695	1.00636	1.0237
20220830_01	SGN-Elect.	1.07986	0.988909	0.977008
20230616_01	SGN-Elect.	1.03825	0.921597	0.819237
20230616_02	SGN-Elect.	1.07479	0.959431	1.0302
20230616_03	SGN-Elect.	1.05607	0.973437	1.08391
20220607_05	SGN-ChR2	0.818525	0.812513	0.811375
20220607_03	SGN-ChR2	0.66075	0.80854	0.846611
20220623_01	SGN-ChR2	0.86387	0.802988	0.850039
20220624_03	SGN-ChR2	0.70432		0.876158
20220809_01	SGN-ChR2	0.591068	0.848573	0.964131
20220809_02	SGN-ChR2	0.707024	0.813853	0.952201
20220809_03	SGN-ChR2	0.621275	0.881671	0.848709
20230418_01	SGN-ChR2	0.896263
20220415_03	Ib/c-ChR2	1.28008	0.663945	0.933897
20220615_02	Ib/c-ChR2	0.916377	0.82362	0.619054
20220617_04	Ib/c-ChR2	0.545197	0.780042	0.795028
20220823_04	Ib/c-ChR2	0.81752	0.825131	0.85703
20220830_01	Ib/c-ChR2	0.669787	0.82682	0.811057
20230526_01	Ib/c-ChR2	0.994332	0.957285	0.839793
20230526_02	Ib/c-ChR2	0.735285	0.786484	0.880778
mean	SGN-Elect.	1.05119	0.969946	0.986811
mean	SGN-ChR2	0.732887	0.828023	0.878461
mean	Ib/c-ChR2	0.851225	0.809047	0.81952
SD	SGN-Elect.	0.0296955	0.0321938	0.101056
SD	SGN-ChR2	0.113667	0.0308158	0.0577209
SD	Ib/c-ChR2	0.241451	0.0867625	0.0995916
Figure 3B: Statistical Analysis Summary
All tests run using Igor Pro 9.00
Levene’s Test Using the Mean for Homogeneity of Variances
//H0= at 5Hz, the variance around the mean of optical stimulation for FoxG1-ChR2, optical stimulation for NtnG1-ChR2, and electrical stimulation of “all” SGNs are equal
StatsVariancesTest /METH=1/T=0 Oct_Ele_5Hz,Oct_Fox_5Hz,Oct_Ntn_5Hz
N = 19
zBar = 0.0600221
W_statistic = 0.383729
critical = 3.63372
Levene's Mean Statistic: 0.383729
Critical Values: 0.9=2.66817		0.95=3.63372		0.99=6.22624
Selected Critical Value: 3.63372
H0: sigma1=sigma2...=sigmaN
H0 Acceptance range (0,0.950000)	==> H0 Accepted
//H0= at 10Hz, the variance around the mean of optical stimulation for FoxG1-ChR2, optical stimulation for NtnG1-ChR2, and electrical stimulation of “all” SGNs are equal
StatsVariancesTest /METH=1/T=0 Oct_Ele_10Hz,Oct_Fox_10Hz,Oct_Ntn_10Hz
N = 18
zBar = 0.0366368
W_statistic = 1.28854
critical = 3.68232
Levene's Mean Statistic: 1.28854
Critical Values: 0.9=2.69517		0.95=3.68232		0.99=6.35887
Selected Critical Value: 3.68232
H0: sigma1=sigma2...=sigmaN
H0 Acceptance range (0,0.950000)	==> H0 Accepted
//H0= at 50Hz, the variance around the mean of optical stimulation for FoxG1-ChR2, optical stimulation for NtnG1-ChR2, and electrical stimulation of “all” SGNs are equal
StatsVariancesTest /METH=1/T=0 Oct_Ele_50Hz,Oct_Fox_50Hz,Oct_Ntn_50Hz
N = 20
zBar = 0.107428
W_statistic = 4.71228
critical = 3.59153
Levene's Mean Statistic: 4.71228
Critical Values: 0.9=2.64464		0.95=3.59153		0.99=6.11211
Selected Critical Value: 3.59153
H0: sigma1=sigma2...=sigmaN
H0 Acceptance range (0,0.950000)	==> H0 Rejected
One-Way ANOVA (+ Welch F Test for results with non-homogenous variances)
//H0= at 5Hz, there are no statistically significant differences between optical stimulation for FoxG1-ChR2, optical stimulation for NtnG1-ChR2, and electrical stimulation of “all” SGNs
StatsANOVA1Test /T=0 Oct_Ele_5Hz,Oct_Fox_5Hz,Oct_Ntn_5Hz
		DF	SS	MS	F	Fc	P
	Groups	2	0.0821396	0.0410698
	Error	16	0.120351	0.00752192
	Total	18	0.20249	0.0112495	5.46002	3.63372	0.0155724
Alpha=0.05
F>Fc ==> Reject H0.
//H0= at 10Hz, there are no statistically significant differences between optical stimulation for FoxG1-ChR2, optical stimulation for NtnG1-ChR2, and electrical stimulation of “all” SGNs
StatsANOVA1Test /T=0 Oct_Ele_10Hz,Oct_Fox_10Hz,Oct_Ntn_10Hz
		DF	SS	MS	F	Fc	P
	Groups	2	0.0847496	0.0423748
	Error	15	0.0540602	0.00360401
	Total	17	0.13881	0.00816528	11.7577	3.68232	0.00084807
Alpha=0.05
F>Fc ==> Reject H0.
//H0= at 50Hz, there are no statistically significant differences between optical stimulation for FoxG1-ChR2, optical stimulation for NtnG1-ChR2, and electrical stimulation of “all” SGNs
StatsANOVA1Test /W/T=0 Oct_Ele_50Hz,Oct_Fox_50Hz,Oct_Ntn_50Hz
		DF	SS	MS	F	Fc	P
	Groups	2	0.311814	0.155907
	Error	17	0.443761	0.0261036
	Total	19	0.755575	0.0397671	5.97263	3.59153	0.0108494
Alpha=0.05
F>Fc ==> Reject H0.
Welch test:
DF1=2 DF2=9 F'=27.9914 F'c=4.25649 P'=0.00013693
F'>F'c ==> Reject H0.
Tukey’s HSD Test
//H0=1 at 5Hz, there is not a statistically significant difference between optical stimulation for FoxG1-ChR2, optical stimulation for NtnG1-ChR2, and electrical stimulation of “all” SGNs.
StatsTukeyTest /T=1/Q Oct_Ele_5Hz,Oct_Fox_5Hz,Oct_Ntn_5Hz
		Difference	SE	Q	Q0.05_16_3	Conclusion	P
	Ele v Ntn	0.167292	0.0359092	4.65874	3.64914	0	0.0120195
	Ele v Fox	0.108351	0.0359092	3.01735	3.64914	1	0.114408
	Fox v Ntn	0.0589409	0.0327805	1.79805	3.64914	1	0.430732
//H0=1 at 10Hz, there is not a statistically significant difference between optical stimulation for FoxG1-ChR2, optical stimulation for NtnG1-ChR2, and electrical stimulation of “all” SGNs.
StatsTukeyTest /T=1/Q Oct_Ele_10Hz,Oct_Fox_10Hz,Oct_Ntn_10Hz
		Difference	SE	Q	Q0.05_16_3	Conclusion	P
	Ele v Ntn	0.1609	0.0248562	6.47321	3.67338	0	0.0009954
	Ele v Fox	0.141923	0.0257048	5.52127	3.67338	0	0.00378722
	Fox v Ntn	0.0189764	0.023617	0.803506	3.67338	1	0.838815
//H0=1 at 50Hz, there is not a statistically significant difference between optical stimulation for FoxG1-ChR2, optical stimulation for NtnG1-ChR2, and electrical stimulation of “all” SGNs.
StatsTukeyTest /T=1/Q Oct_Ele_50Hz,Oct_Fox_50Hz,Oct_Ntn_50Hz
		Difference	SE	Q	Q0.05_16_3	Conclusion	P
	Ele v Fox	0.3183	0.0651293	4.8872	3.62796	0	0.00804946
	Ele v Ntn	0.199962	0.0668947	2.9892	3.62796	1	0.116694
	Fox v Ntn	0.118338	0.0591271	2.00142	3.62796	1	0.355517
