# Supplementary material for: An anatomical and physiological basis for flexible coincidence detection in the auditory system
Source: eLife. 2025 Apr 15;13:RP100492. doi: 10.7554/eLife.100492 (PMC11999698; doi:10.7554/eLife.100492)
Supplement: Figure 3—source data 2. [file elife-100492-fig3-data2.xlsx]

## Sheet: Figure 3C
Figure 3C
		--- Pulse Number ---
Experiment ID	Group	2	3	4	5
20220809_02	SGN-Elect.	1.00695	0.870531	1.0759	1.0782
20220830_01	SGN-Elect.	1.07986	1.01545	0.956027	0.898918
20230616_01	SGN-Elect.	1.03825	0.894243	0.82087	0.797828
20230616_02	SGN-Elect.	1.07479	0.922876	0.816552	0.7529
20230616_03	SGN-Elect.	1.05607	1.1318	0.825222	0.741252
20221118_01	SGN-Elect. + high Ca	0.933034	0.783983	0.692548	0.621159
20221118_02	SGN-Elect. + high Ca	0.935231	0.891128	0.834312	0.80091
20230621_03	SGN-Elect. + high Ca	1.03076	1.10824	0.950982	0.98091
20220607_05	SGN-ChR2	0.818525	0.616427	0.449154	0.37244
20220607_03	SGN-ChR2	0.66075	0.584208	0.436009	0.224742
20220623_01	SGN-ChR2	0.86387	0.673779	0.529487	0.413226
20220624_03	SGN-ChR2	0.70432	0.543705	0.441609	0.442507
20220809_01	SGN-ChR2	0.591068	0.631501	0.395458	0.266175
20220809_02	SGN-ChR2	0.707024	0.758389	0.708993	0.418854
20220809_03	SGN-ChR2	0.621275	0.56546	0.402921	0.448162
20230418_01	SGN-ChR2	0.896263
mean	SGN-Elect.	1.05119	0.96698	0.898913	0.85382
mean	SGN-Elect. + high Ca	0.966341	0.927784	0.825947	0.800993
mean	SGN-ChR2	0.732887	0.624781	0.480519	0.369443
SD	SGN-Elect.	0.0296954	0.1073	0.114989	0.139976
SD	SGN-Elect. + high Ca	0.0557975	0.165207	0.12942	0.179876
SD	SGN-ChR2	0.113667	0.0731498	0.109798	0.0889805
Figure 3C: Statistical Analysis Summary
All tests run using Igor Pro 9.00
Levene’s Test Using the Mean for Homogeneity of Variances
//H0= the variance around the mean of electrical stimulation pulses under both calcium conditions are equal
StatsVariancesTest Oct_Ele_Pulse2,Oct_Ele_Pulse3,Oct_Ele_Pulse4,Oct_Ele_Pulse5,Oct_HiC_Pulse2,Oct_HiC_Pulse3,Oct_HiC_Pulse4,Oct_HiC_Pulse5
N = 32
PooledVariance = 0.0141611
Bartlett_T = 9.32412
critical = 14.0671
Bartlett's T Statistic: 9.32412
Critical Values: 0.9=12.017		0.95=14.0671		0.99=18.4753
Selected Critical Value: 14.0671
H0: sigma1=sigma2
H0 Acceptance range (0,0.950000)	==> H0 Accepted
//H0= the variance around the mean of optical stimulation for FoxG1-ChR2 and NtnG1-ChR2 are equal
StatsVariancesTest Oct_Fox_Pulse2,Oct_Fox_Pulse3,Oct_Fox_Pulse4,Oct_Fox_Pulse5,Oct_Ntn_Pulse2,Oct_Ntn_Pulse3,Oct_Ntn_Pulse4,Oct_Ntn_Pulse5
N = 56
PooledVariance = 0.0343827
Bartlett_T = 18.7144
critical = 14.0671
Bartlett's T Statistic: 18.7144
Critical Values: 0.9=12.017		0.95=14.0671		0.99=18.4753
Selected Critical Value: 14.0671
H0: sigma1=sigma2
H0 Acceptance range (0,0.950000)	==> H0 Rejected
//H0= the variance around the mean of optical stimulation for FoxG1-ChR2 and electrical stimulation of “all” SGNs are equal
StatsVariancesTest /T=0 Oct_Ele_Pulse2,Oct_Ele_Pulse3,Oct_Ele_Pulse4,Oct_Ele_Pulse5,Oct_Fox_Pulse2,Oct_Fox_Pulse3,Oct_Fox_Pulse4,Oct_Fox_Pulse5
N = 49
PooledVariance = 0.0103226
Bartlett_T = 8.24629
critical = 14.0671
Bartlett's T Statistic: 8.24629
Critical Values: 0.9=12.017		0.95=14.0671		0.99=18.4753
Selected Critical Value: 14.0671
H0: sigma1=sigma2
H0 Acceptance range (0,0.950000)	==> H0 Accepted
One-Way ANOVA (+ Welch F Test for results with non-homogenous variances)
//H0= there are no statistically significant differences between Electrical Stimulation under 1.4mM Calcium and 2.4mM Calcium
StatsANOVA1Test /T=0 Oct_Ele_Pulse2,Oct_Ele_Pulse3,Oct_Ele_Pulse4,Oct_Ele_Pulse5,Oct_HiC_Pulse2,Oct_HiC_Pulse3,Oct_HiC_Pulse4,Oct_HiC_Pulse5
		DF	SS	MS	F	Fc	P
	Groups	7	0.196842	0.0281203
	Error	24	0.339865	0.0141611
	Total	31	0.536707	0.0173131	1.98575	2.42263	0.0995055
Alpha=0.05
F<=Fc ==> Accept H0.
//H0= there are no statistically significant differences between Optical Stimulation of FoxG1-ChR2 Inputs and NtnG1-ChR2 Inputs
StatsANOVA1Test /T=0 Oct_Fox_Pulse2,Oct_Fox_Pulse3,Oct_Fox_Pulse4,Oct_Fox_Pulse5,Oct_Ntn_Pulse2,Oct_Ntn_Pulse3,Oct_Ntn_Pulse4,Oct_Ntn_Pulse5
		DF	SS	MS	F	Fc	P
	Groups	7	1.20773	0.172533
	Error	48	1.65037	0.0343827
	Total	55	2.8581	0.0519655	5.01801	2.20744	0.000254485
Alpha=0.05
F>Fc ==> Reject H0.
Welch test:
DF1=7		DF2=19		F'=8.4775		F'c=2.54353		P'=9.80014e-05
F'>F'c ==> Reject H0.
//H0= there are no statistically significant differences between Electrical Stimulation under 1.4mM Calcium and Optical Stimulation of FoxG1-ChR2 Inputs under 1.4mM Calcium
StatsANOVA1Test /T=0 Oct_Ele_Pulse2,Oct_Ele_Pulse3,Oct_Ele_Pulse4,Oct_Ele_Pulse5,Oct_Fox_Pulse2,Oct_Fox_Pulse3,Oct_Fox_Pulse4,Oct_Fox_Pulse5
		DF	SS	MS	F	Fc	P
	Groups	7	2.42832	0.346903
	Error	41	0.423228	0.0103226
	Total	48	2.85155	0.0594073	33.6061	2.24289	4.996e-15
Alpha=0.05
F>Fc ==> Reject H0.
Tukey’s HSD Test
//H0=1 there is not a statistically significant difference between equivalent pulse numbers in the Optical Stimulation of FoxG1-ChR2 or NtnG1-ChR2 Inputs.
StatsTukeyTest /T=0 Oct_Fox_Pulse2,Oct_Fox_Pulse3,Oct_Fox_Pulse4,Oct_Fox_Pulse5,Oct_Ntn_Pulse2,Oct_Ntn_Pulse3,Oct_Ntn_Pulse4,Oct_Ntn_Pulse5
		Difference	SE	Q	Q0.05_16_3	Conclusion	P
	Oct_Ntn_Pulse2_vs_Oct_Fox_Pulse2	0.118338	0.0678589	1.74389	4.48063	1	0.917769
	Oct_Fox_Pulse3_vs_Oct_Ntn_Pulse3	0.017137	0.0700844	0.24452	4.48063	1	1
	Oct_Ntn_Pulse4_vs_Oct_Fox_Pulse4	0.0243693	0.0700844	0.347714	4.48063	1	0.999997
	Oct_Ntn_Pulse5_vs_Oct_Fox_Pulse5	0.103473	0.0729461	1.41848	4.48063	1	0.971776
//H0=1 there is not a statistically significant difference between equivalent pulse numbers in the Optical Stimulation of FoxG1-ChR2 or Electrical Stimulation of “all” SGN Inputs.
StatsTukeyTest /T=0 Oct_Ele_Pulse2,Oct_Ele_Pulse3,Oct_Ele_Pulse4,Oct_Ele_Pulse5,Oct_Fox_Pulse2,Oct_Fox_Pulse3,Oct_Fox_Pulse4,Oct_Fox_Pulse5
		Difference	SE	Q	Q0.05_16_3	Conclusion	P
	Oct_Ele_Pulse2_vs_Oct_Fox_Pulse2	0.3183	0.0409564	7.77168	4.51467	0	5.78407e-05
	Oct_Ele_Pulse3_vs_Oct_Fox_Pulse3	0.342199	0.0420665	8.1347	4.51467	0	2.53106e-05
	Oct_Ele_Pulse4_vs_Oct_Fox_Pulse4	0.418395	0.0420665	9.94602	4.51467	0	4.00256e-07
	Oct_Ele_Pulse5_vs_Oct_Fox_Pulse5	0.484376	0.0420665	11.5145	4.51467	0	1.18784e-08
//H0=1 there is not a statistically significant difference between Electrical Stimulation under 1.4mM Calcium and 2.4mM Calcium.
StatsTukeyTest /T=0 Oct_Ele_Pulse2,Oct_Ele_Pulse3,Oct_Ele_Pulse4,Oct_Ele_Pulse5,Oct_Fox_Pulse2,Oct_Fox_Pulse3,Oct_Fox_Pulse4,Oct_Fox_Pulse5
		Difference	SE	Q	Q0.05_16_3	Conclusion	P
	Oct_Ele_Pulse2_vs_Oct_HiC_Pulse2	0.084846	0.0614515	1.3807	4.68375	1	0.973628
	Oct_Ele_Pulse3_vs_Oct_ HiC_Pulse3	0.0391964	0.0614515	0.637843	4.68375	1	0.999773
	Oct_Ele_Pulse4_vs_Oct_ HiC_Pulse4	0.072966	0.0614515	1.18738	4.68375	1	0.98871
	Oct_Ele_Pulse5_vs_Oct_ HiC_Pulse5	0.0528269	0.0614515	0.859652	4.68375	1	0.998424
