# Supplementary material for: An anatomical and physiological basis for flexible coincidence detection in the auditory system
Source: eLife. 2025 Apr 15;13:RP100492. doi: 10.7554/eLife.100492 (PMC11999698; doi:10.7554/eLife.100492)
Supplement: Figure 5—source data 1. [file elife-100492-fig5-data1.xlsx]

## Sheet: Figure 5G
Figure 5G
Experiment ID	Group	% Change Height
20221010_01	ChR2	-0.352746
20221011_01	ChR2	-0.165866
20221011_02	ChR2	-0.22858
20221011_03	ChR2	-0.365536
20221122_01	ChR2	-0.157071
20221129_03	ChR2	-0.329357
20230109_02	ChR2	-0.267536
20230121_03	ChR2	-0.14779
20221219_01	Gly	-0.10656
20221220_01	Gly	-0.231672
20221220_02	Gly	-0.198339
20230120_01	Gly	-0.0150196
20221010_01	STN	0.0895503
20221129_03	STN	0.0795678
20221207_01	STN	0.152061
20221220_01	STN	-0.00351494
20221220_02	STN	-0.0567518
20230120_01	STN	-0.0150196
mean	ChR2	-0.25181
mean	Gly.	-0.137898
mean	STN	0.0409822
SD	ChR2	0.0903201
SD	Gly.	0.0975156
SD	STN	0.078555
