# Supplementary material for: An anatomical and physiological basis for flexible coincidence detection in the auditory system
Source: eLife. 2025 Apr 15;13:RP100492. doi: 10.7554/eLife.100492 (PMC11999698; doi:10.7554/eLife.100492)
Supplement: Figure 5—source data 2. [file elife-100492-fig5-data2.xlsx]

## Sheet: Figure 5H
Figure 5H
Experiment ID	Group	Peak Shift (ms)
20221010_01	ChR2	-56
20221011_01	ChR2	-48
20221011_02	ChR2	-108
20221011_03	ChR2	-52
20221122_01	ChR2	-28
20221129_03	ChR2	-44
20230109_02	ChR2	-84
20230121_03	ChR2	-40
20221219_01	Gly	-57.8922
20221220_01	Gly	-35.2
20221220_02	Gly	-74.8
20230120_01	Gly	-24
20221010_01	STN	171.6
20221129_03	STN	71.99
20221220_01	STN	50
20221220_02	STN	111.867
20230120_01	STN	216
mean	ChR2	-57.5
mean	Gly.	-56.84
mean	STN	41.7677
SD	ChR2	26.0055
SD	Gly.	124.291
SD	STN	69.0246
