# Supplementary material for: An anatomical and physiological basis for flexible coincidence detection in the auditory system
Source: eLife. 2025 Apr 15;13:RP100492. doi: 10.7554/eLife.100492 (PMC11999698; doi:10.7554/eLife.100492)
Supplement: Supplementary file 1. — Experimental genotypes, their abbreviations, and a description of reporter expression are listed for the relevant figures. [file elife-100492-supp1.xlsx]

## Sheet: Supp File 1
Summary and description of experimental genotypes presented in figures
	Experimental Genotype	Abbreviation	Description
Figure 1B	Slc6a5Cre/+; Ai34tg/+	Slc6a5-syp/tdT	syp/tdT in glycinergic Slc6a5 inhibitory neurons
Figure 1C	Slc6a5Cre/+; Ai34tg/+; Thy1tg/+	Slc6a5-syp/tdT; Thy1	syp/tdT in glycinergic Slc6a5 inhibitory neurons; YFP octopus cells
Figure 1D; 1F-G, black	Foxg1Cre/+; Ai34tg/+; Thy1tg/+	Foxg1-syp/tdT; Thy1	syp/tdT in Foxg1 SGNs; YFP octopus cells
Figure 1E; 1F-G, green	Slc6a5Cre/+; Ai34tg/+; Thy1tg/+	Slc6a5-syp/tdT; Thy1	syp/tdT in glycinergic Slc6a5 inhibitory neurons; YFP octopus cells
Figure 2B	Ntng1Cre/+; Ai14tg/+; Foxg1Flp/+; RCE:FRTtg/+	Ntng1­-tdT; Foxg1-EYFP	tdT in Ntng1 Ib/c SGNs; EYFP in all SGNs
Figure 2C-F	Ntng1Cre/+; Ai34tg/+; Thy1tg/+	Ntng1-syp/tdT; Thy1	syp/tdT in Ntng1 Ib/c SGNs; YFP octopus cells
Figure 2-figure supplement 1A-C	Ntng1Cre/+; Ai14tg/+; Foxg1Flp/+; RCE:FRTtg/+	Ntng1­-tdT; Foxg1-EYFP	tdT in Ntng1 Ib/c SGNs; EYFP in all SGNs
Figure 2-figure supplement 1D-E	Ntng1Cre/+; Ai14tg/+	Ntng1­-tdT	tdT in Ntng1 Ib/c SGNs and other neurons
Figure 2-figure supplement 1F	Ntng1Cre/+; Ai34tg/+	Ntng1-syp/tdT	syp/tdT in Ntng1 Ib/c SGNs
Figure 2-figure supplement 2A-F	Myo15iCre/+; Ai14tg/+; Foxg1Flp/+; RCE:FRTtg/+	Myo15-tdT; Foxg1-EYFP	tdT in Myo15 Ic SGNs; EYFP in all SGNs
Figure 2-figure supplement 2G-I	Myo15iCre/+; Ai34tg/+; Thy1tg/+	Myo15-syp/tdT; Thy1	syp/tdT in Myo15 Ic SGNs; YFP octopus cells
Figure 3A-C, black	Foxg1Cre/+; Ai32tg/+	Foxg1-ChR2	ChR2 in Foxg1 SGNs
Figure 3A-C, magenta	Ntng1Cre/+; Ai32tg/+	Ntng1-ChR2	ChR2 in Ntng1 Ib/c SGNs
Figure 4A-C	Slc6a5Cre/+; Ai32tg/+	Slc6a5-ChR2	ChR2 in glycineregic Slc6a5 inhibitory neurons
Figure 5F-H	Slc6a5Cre/+; Ai32tg/+	Slc6a5-ChR2	ChR2 in glycinergic Slc6a5 inhibitory neurons
